# Supplementary material for: Regulating the electronic structure of MoO2/Mo2C/C by heterostructure and oxygen vacancies for boosting lithium storage kinetics
Source: Royal Society of Chemistry journal article supplement (doi:10.1039/d2dt01917e), 2022-01-01
Supplement: d2dt01917e1.pdf [file d2dt01917e1.pdf]

## Regulating the electronic structure of MoO<sub>2</sub>/Mo<sub>2</sub>C/C by heterostructure and oxygen vacancies for boosting lithium storage kinetics

Donglei Guo<sup>a,1</sup>, Mengke Yang<sup>a,b,1</sup>, Fang Wang<sup>a</sup>, Yihua Cheng<sup>a</sup>, Anqi Zhang<sup>a</sup>, Guilong Liu<sup>a</sup>, Naiteng Wu<sup>a</sup>, Ang Cao<sup>c</sup>, Hongyu Mi<sup>\*b</sup> and Xianming Liu<sup>\*a</sup>

<sup>a</sup> Key Laboratory of Function-oriented Porous Materials, College of Chemistry and Chemical Engineering, Luoyang Normal University, Luoyang, 471934, P. R. China.

\*Email: myclxm@163.com

<sup>b</sup> State Key Laboratory of Chemistry and Utilization of Carbon Based Energy Resources, School of Chemical Engineering and Technology, Xinjiang University, Urumqi, 830046, P. R. China.

\*Email: mmihongyu@163.com

<sup>c</sup> Department of Physics, Technical University of Denmark, Lyngby 2800, Denmark.

## Experimental Section

**Characterizations:** X-ray diffraction (XRD), field-emission scanning electron microscope (FESEM, Sigma 500) and a H-8100 transmission electron microscopy (TEM) were employed to characterize the phase composition, structure and morphologies of as-prepared products. The energy dispersive spectrometer (EDS) and element maps were taken on a Sigma 500 FESEM unit. The Raman spectra were collected on an Invia Raman spectrometer with the excitation laser wave-length of 633 nm. The X-ray photoelectron spectra (XPS) were recorded on an ESCALAB 250 spectrometer (Perkin-Elmer). The electron paramagnetic resonances (EPR) were tested on a Bruker EMX Micro spectrometer at room temperature. The specific surface areas were calculated using a standard Brunauer-Emmett-Teller (BET) method on a Belsorp-max surface area detecting instrument. The thermo-gravimetric analysis (TGA) was carried out on a DTG-60AH instrument under the air flow. The photoluminescence (PL) spectra were obtained by using a Cary Eclipse fluorescence spectrometer (Varian, USA).

**Electrochemical measurements:** The assembly of CR2032 coin cells was carried in an argon-filled glove box with water and oxygen contents below 0.5 ppm. The free-standing  $\text{MoO}_2/\text{Mo}_2\text{C}/\text{C}$  film was directly cut into the disk with the diameter of 1.2 cm as the working electrode. Lithium metal foil as counter electrode and  $1 \text{ mol L}^{-1}$   $\text{LiPF}_6$  solution with the mixture of EC: DEC: EMC at volume ratio of 1:1:1 as electrolyte. The charge-discharge profiles of the samples were determined by cycling in the potential range of 0.01-3 V at different current rates. Cyclic voltammetry measurements (CV, at different scanning rates) and electrochemical impedance spectroscopy (EIS, in the frequency range from 100,000 to 0.01 Hz) were investigated on a Parstat 4000+ workstation (Princeton Applied Research).

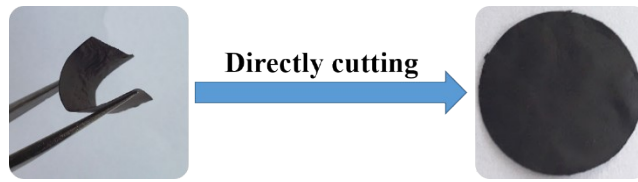

Fig. S1 Digital photographs of as-prepared  $\text{MoO}_2/\text{Mo}_2\text{C}/\text{C}$  film and corresponding electrode disk.

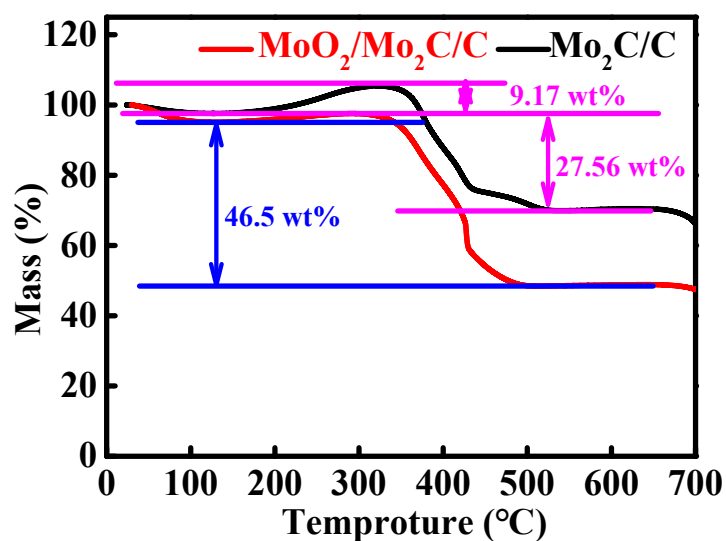

Fig. S2 TGA curves of MoO<sub>2</sub>/Mo<sub>2</sub>C/C and Mo<sub>2</sub>C/C.

The TGA analysis of MoO<sub>2</sub>/Mo<sub>2</sub>C/C and Mo<sub>2</sub>C/C was carried out to calculate the carbon content in MoO<sub>2</sub>/Mo<sub>2</sub>C/C. The Mo<sub>2</sub>C/C and MoO<sub>2</sub>/Mo<sub>2</sub>C/C samples were prepared from the same precursor and annealed temperature, just with different annealed time. The increasing mass of MoO<sub>2</sub>/Mo<sub>2</sub>C/C is corresponded to the oxidation of MoO<sub>2</sub> and Mo<sub>2</sub>C. The carbon content in MoO<sub>2</sub>/Mo<sub>2</sub>C/C is determined to be about 50.4 wt% and the involved reaction as follows:

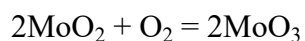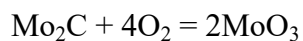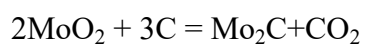

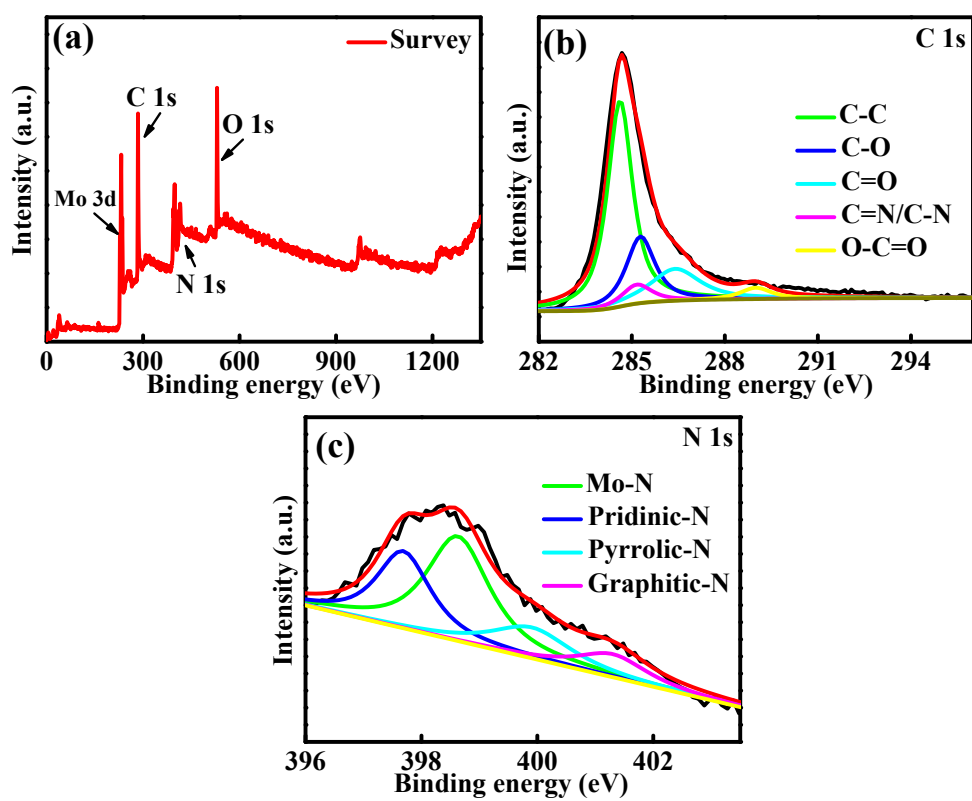

Fig. S3 (a) The XPS survey spectrum of MoO<sub>2</sub>/Mo<sub>2</sub>C/C. High-resolution XPS spectra of MoO<sub>2</sub>/Mo<sub>2</sub>C/C: (b) C 1s and (c) N1s.

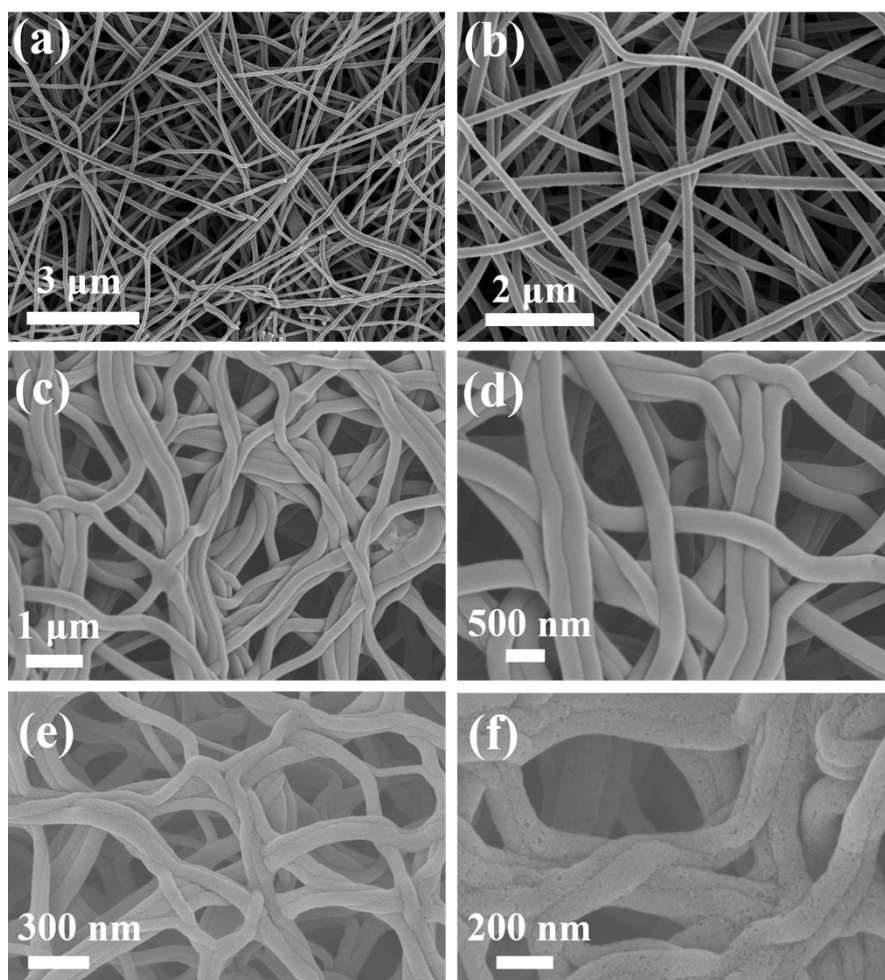

Fig. S4 (a, b) FESEM images of precursor. (c, d) FESEM images of MoO<sub>2</sub>/C. (e, f) FESEM images of Mo<sub>2</sub>C/C.

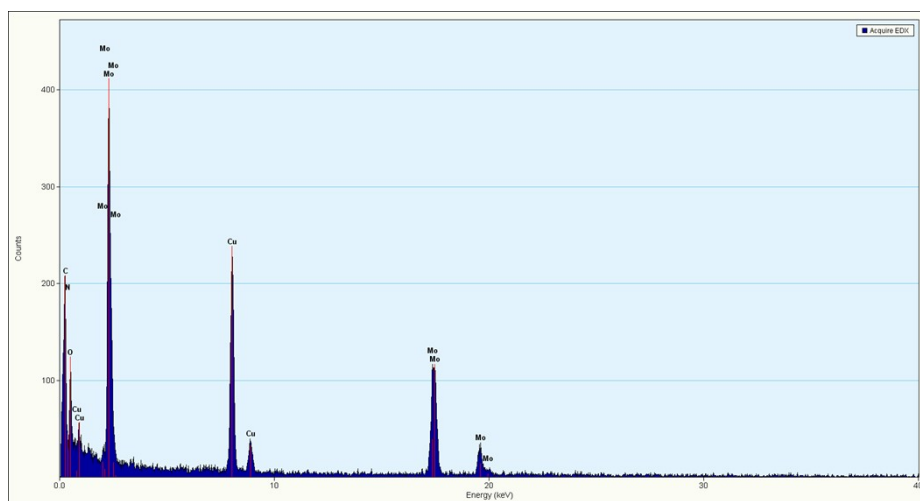

Fig. S5 The HAADF-STEM EDX image of MoO<sub>2</sub>/Mo<sub>2</sub>C/C.

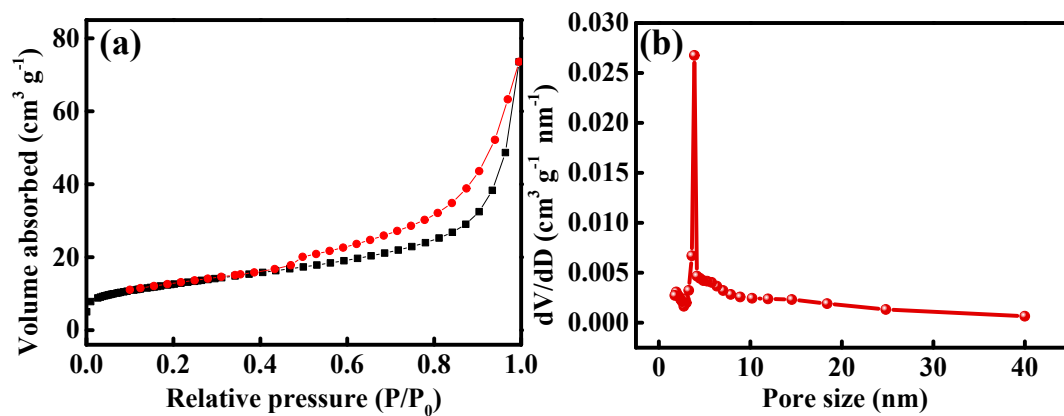

Fig. S6 N<sub>2</sub> adsorption-desorption isotherm (a) and pore size distribution (b) of MoO<sub>2</sub>/Mo<sub>2</sub>C/C according to the NLDFT model.



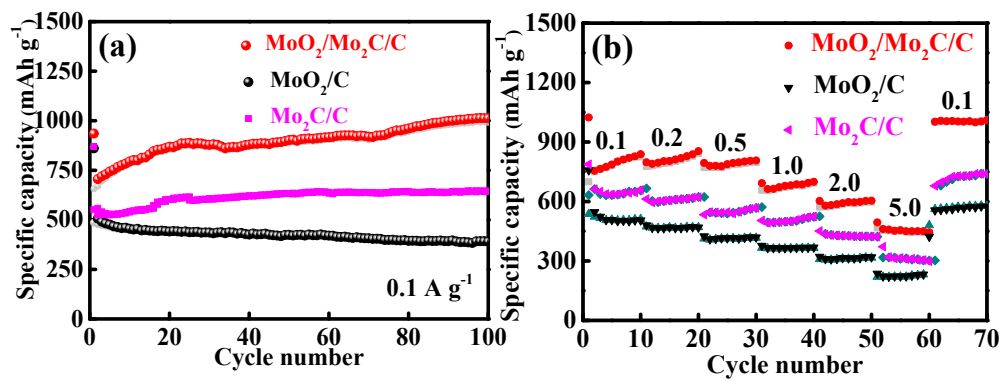

Fig. S7 Cyclic performance (a) and rate performance (b) of MoO<sub>2</sub>/Mo<sub>2</sub>C/C, MoO<sub>2</sub>/C and Mo<sub>2</sub>C/C.

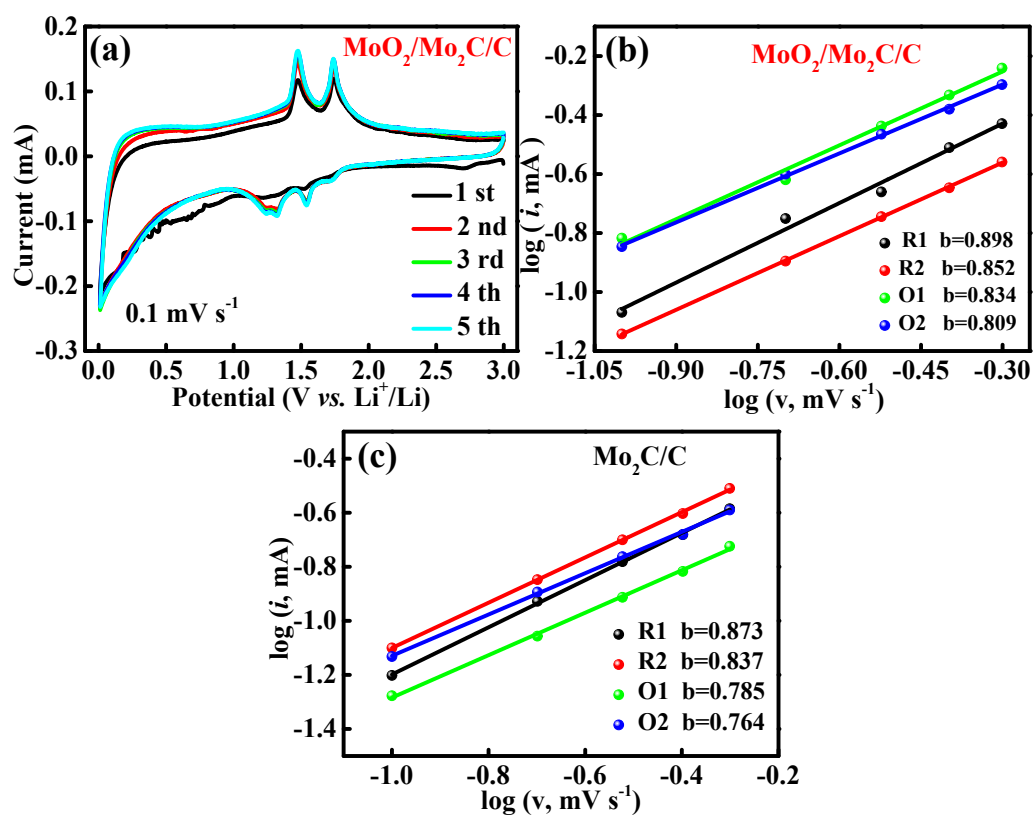

Fig. S8 (a) CV curves of MoO<sub>2</sub>/Mo<sub>2</sub>C/C at a scan rate of 0.1 mV s<sup>-1</sup>. (b) Log (i) versus log (v) plots at different oxidation and reduction states of MoO<sub>2</sub>/Mo<sub>2</sub>C/C. (c) Log (i) versus log (v) plots at different oxidation and reduction states of MoO<sub>2</sub>/C.

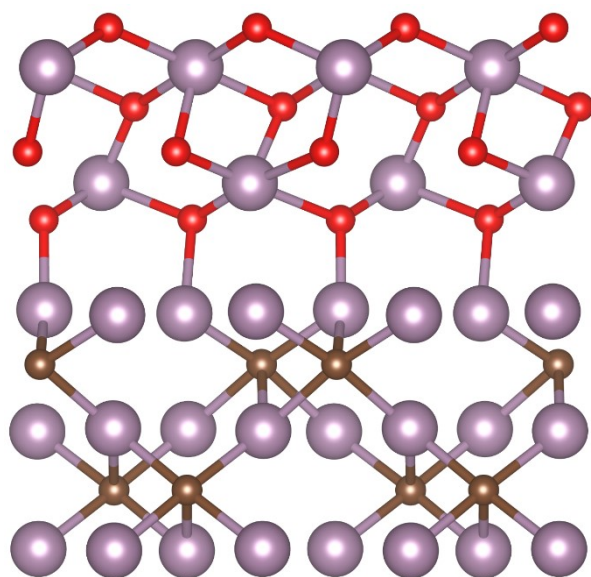

Fig. S9 Geometrically optimized models of MoO<sub>2</sub>/Mo<sub>2</sub>C heterointerface model.

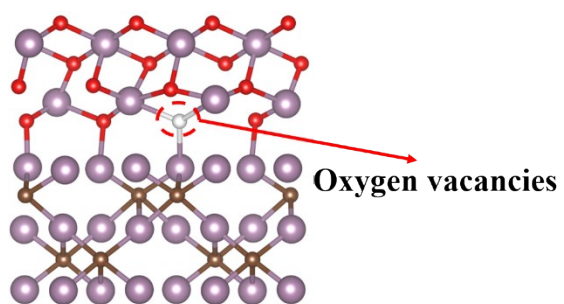

Fig. S10 Geometrically optimized model of MoO<sub>2</sub>/Mo<sub>2</sub>C with oxygen vacancies.

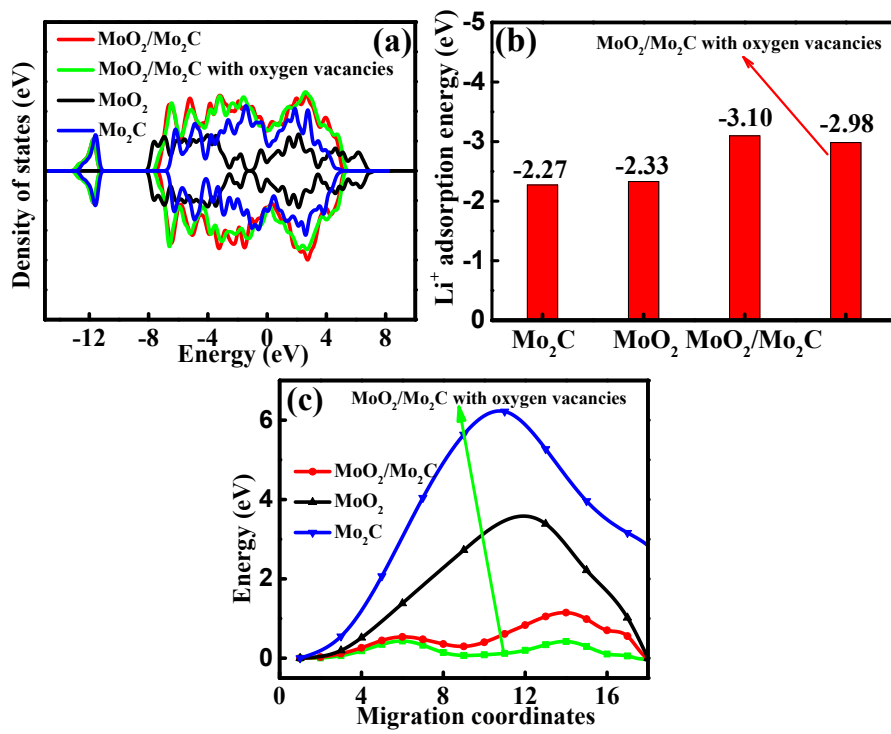

Fig. S11 Calculated DOS (a), adsorption energy of Li (b) and migration energy profiles (c) of MoO<sub>2</sub>/Mo<sub>2</sub>C heterostructures, MoO<sub>2</sub>, Mo<sub>2</sub>C and MoO<sub>2</sub>/Mo<sub>2</sub>C with oxygen vacancies models.

**Table S1.** Comparison of the electrochemical performance of the MoO<sub>2</sub>/Mo<sub>2</sub>C/C with reported MoO<sub>2</sub>-based anodes for LIBs.

| MoO <sub>2</sub> -based materials       | Rate capability                                                       | Cyclic performance                                                                 | Ref. |
|-----------------------------------------|-----------------------------------------------------------------------|------------------------------------------------------------------------------------|------|
|                                         | Current density (A g <sup>-1</sup> )/Capacity (mA h g <sup>-1</sup> ) | Current density (A g <sup>-1</sup> )/Cycle number/Capacity (mA h g <sup>-1</sup> ) |      |
| MoO <sub>2</sub> @C                     | 1/543                                                                 | 1/1000/443.8                                                                       | [1]  |
| MoO <sub>2</sub> @NC                    | 5/345                                                                 | 0.5/100/692.4                                                                      | [2]  |
| MoO <sub>2</sub> /Ni/C                  | 1/463                                                                 | 1/800/445                                                                          | [3]  |
| MoO <sub>2</sub> /C                     | 5/363.2                                                               | 5/3000/193.5                                                                       | [4]  |
| MoO <sub>2</sub> /NC NFs                | 10/291                                                                | 1/600/720                                                                          | [5]  |
| MoO <sub>2</sub> @RGO                   | 2/473                                                                 | 1/50/523                                                                           | [6]  |
| MoO <sub>2</sub> @C                     | 2/312                                                                 | 1/600/537                                                                          | [7]  |
| MoO <sub>2</sub> /Mo <sub>2</sub> C/RGO | 1/200                                                                 | 0.5/150/500                                                                        | [8]  |
| MoO <sub>2</sub> /Mo <sub>2</sub> N     | 5/415                                                                 | 0.1/100/815                                                                        | [9]  |
| MoO <sub>2</sub> /Mo <sub>2</sub> C/C   | 10/297.8                                                              | 1/2400/507.3                                                                       | [10] |
| MoO <sub>2</sub> /MoP-NBs               | 8/291.2                                                               | 1/1000/515                                                                         | [11] |
| MoO <sub>2</sub> @MoS <sub>2</sub>      | 1/700                                                                 | 0.5/100/815                                                                        | [12] |
| <b>This work</b>                        | <b>5/454.7</b>                                                        | <b>2/1000/569</b>                                                                  |      |

## References in Supporting Information

- [1] G. L. Xia, F. C. Zheng, Y. Yang, J. W. Su and Q. W. Chen, *J. Mater. Chem. A*, 2016, **4**, 12434-12441.
- [2] X. J. Tan, C. F. Cui, S. Q. Wu, B. C. Qiu, L. Z. Wang, J. L. Zhang, *Chem. Asian J*, 2017, **12**, 36-40.
- [3] Q. Xia, H. L. Zhao, Z. H. Du, Z. J. Zhang, S. M. Li, C. H. Gao and K. Świerczek, *J. Mater. Chem. A*, 2016, **4**, 605-611.
- [4] C. X. Hou, W. Y. Yang, X. B. Xie, X. Q. Sun, J. Wang, N. Naik, D. Pan, X. M. Mai, Z. H. Guo, F. Dang and W. Du, *J. Colloid Interface. Sci.*, 2021, **596**, 396-407.
- [5] J. J. Liang, X. Gao, J. Guo, C. M. Chen, K. Fan and J. M. Ma, *Sci. China Mater.*, 2018, **61**, 30-38.
- [6] X. C. Chen, R. P. Liu, L. X. Zeng, X. X. Huang, Y. X. Fang, J. B. Liu, Y. X. Xu, Q. H. Chen, M. D. Wei and Q. R. Qian, *Mater. Lett.*, 2017, **212**, 198-201.
- [7] Z. Chen, T. Yang, H. M. Shi, T. H. Wang, M. Zhang and G. Z. Cao, *Adv. Mater. Interfaces*, 2017, **4**, 1600816.
- [8] W. Devina, J. Hwang and J. Kim, *Chem. Eng. J.*, 2018, **345**, 1-12.
- [9] J. Liu, S. S. Tang, Y. K. Lu, G. M. Cai, S. Q. Liang, W. J. Wang and X. L. Chen, *Energy Environ. Sci.*, 2013, **6**, 2691-2697.
- [10] C. X. Hou, J. Wang, W. Du, J. C. Wang, Y. Du, C. T. Liu, J. X. Zhang, H. Hou, F. Dang, L. L. Zhao and Z. H. Guo, *J. Mater. Chem. A*, 2019, **7**, 13460-13472.
- [11] Y. H. Shen, Y. L. Jiang, Z. Z. Yang, J. Dong, W. Yang, Q. Y. An and L. Q. Mai, *Adv. Sci.*, 2022, **9**, 2104504.
- [12] Z. N. Deng, Y. J. Hu, D. Y. Ren, S. L. Lin, h. Jiang and C. Z. Li, *Chem. Commun.*, 2015, **51**, 13838-13841.
